# Supplementary material for: Burst, Short, and Sustained Vitamin D3 Applications Differentially Affect Osteogenic Differentiation of Human Adipose Stem Cells
Source: MDPI journal article supplement (doi:10.3390/ijms21093202), 2020-04-30
Supplement: s1 [file s1]

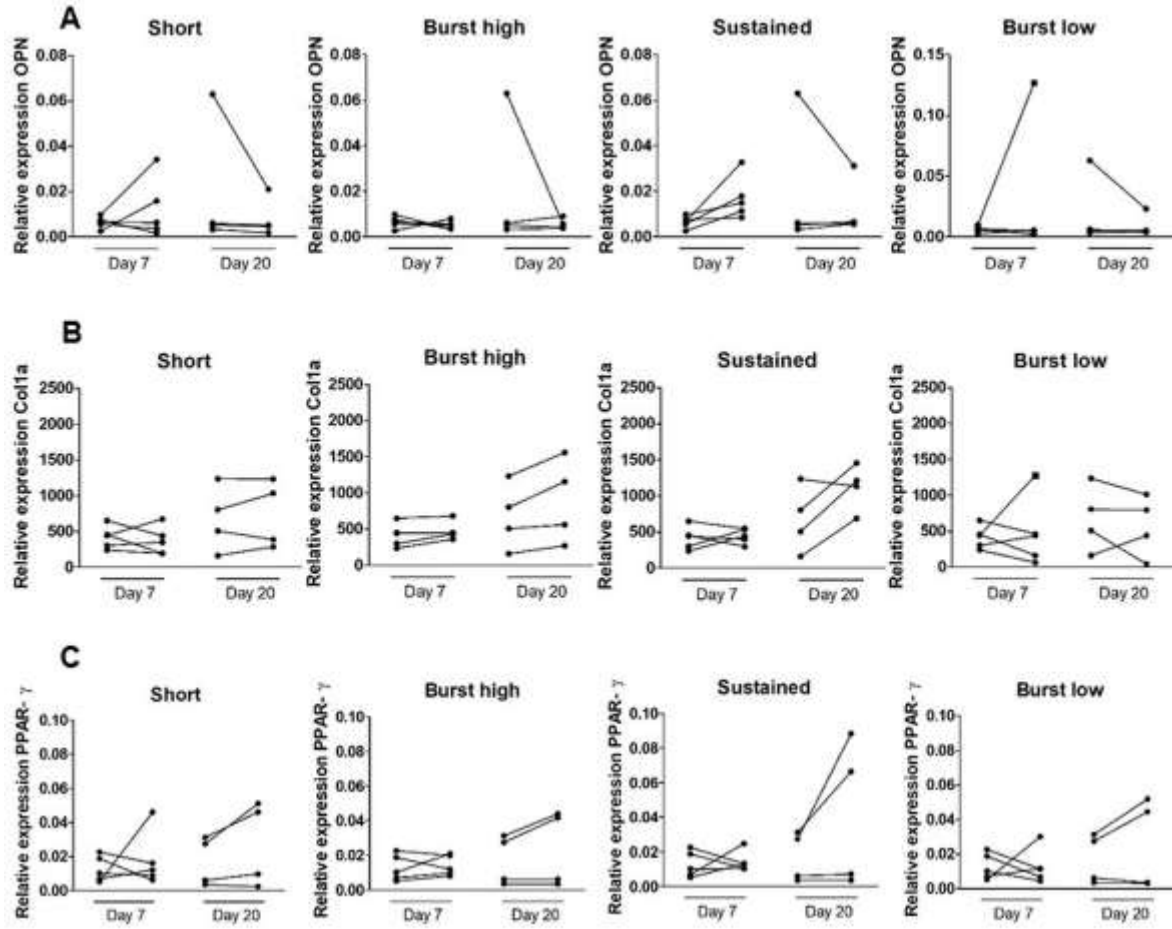

**Figure S1.** (A) Gene expression of the osteogenic marker OPN measured at day 7 and day 20. (B) Gene expression of COL1a1 was measured at day 7 and day 20. (C) Gene expression of the adipogenic marker PPAR $\gamma$  was measured at day 7 and day 20.  $\text{vitD}_3$  did not affect the expression of any of these markers. Gene expression in controls (left) and  $\text{vitD}_3$ -treated cultures (right) of the same donor are connected by a line. All gene expression levels were normalized to HPRT.
